# Supplementary material for: New DNA Methylation Signals for Malignant Pleural Mesothelioma Risk Assessment
Source: MDPI journal article supplement (doi:10.3390/cancers13112636), 2021-05-27
Supplement: s1 [file s1]

## Article

# New DNA Methylation Signals for Malignant Pleural Mesothelioma Risk Assessment

Giovanni Cugliari <sup>1,\*</sup>, Alessandra Allione <sup>1</sup>, Alessia Russo <sup>1</sup>, Chiara Catalano <sup>1</sup>, Elisabetta Casalone <sup>1</sup>, Simonetta Guarrera <sup>2,3</sup>, Federica Grosso <sup>4</sup>, Daniela Ferrante <sup>5,6</sup>, Marika Sculco <sup>7</sup>, Marta La Vecchia <sup>7</sup>, Chiara Pirazzini <sup>8</sup>, Roberta Libener <sup>9</sup>, Dario Mirabelli <sup>10,11</sup>, Corrado Magnani <sup>5,6,11</sup>, Irma Dianzani <sup>7,11</sup> and Giuseppe Matullo <sup>1,11,12,\*</sup>

## cg03546163

TTTTTGTTTAGGATGAATTAGTTTGGAGAGGAAAGAATATTTGTTTGTATATTTGT  
AGAAGAAGTTATTGTTGTTAAAAGTTAAGTTGGTTTTTTGATGTTTAGTGTGGATAG  
GTTGAATAATAATTTATTTTACG(CpG1)TT**CG(CpG2)**GAGGGTTATTTTATGTA  
AATAGTTGAAAGGAATTGGATAAGATTGTAGTTTTT

**Figure S1.** Location of cg03546163 investigated by EpiTYPER MassARRAY. Locations of cg03546163 (CpG2, in yellow) and a second CpG site very close (CpG1, in red), investigated by EpiTYPER MassARRAY. Flanking primers are underlined. The CpG sites could not be tested individually due to MassARRAY technology constraints, but had to be tested jointly as a single unit: the methylation level is the cumulative value of all the sites within the CpG unit.

## cg06633438

TTTTTTTAGTTTTGGGATTTTGAGATATTAGGATAGCG(CpG1)TTATTAATTTAGG  
AGTAGTTTTTGTGTTTGTGTGTGTACG(CpG2)TGTGCG(CpG3)TTTGTGTGTAGGT  
TGGATTTTGATTTTAAAAGGGTTAGGATATGAAAAGAGACG(CpG4)AGCG(CpG5)T  
TTTAGATTTGAGGAAATATACG(CpG6)CG(CpG7)TGGAAGACG(CpG8)TGCG(CpG  
9)**CG(CpG10)**GGGTTTCG(CpG11)GGTTTTTTTTTGGAGGAGTGATAAGTTCG(CpG12  
)TGGAAAGTTTTAATATGGCG(CpG13)GGCG(CpG14)GGGGTGGGGGCG(CpG15)A  
TAGGATTTGTTTGTTTTAGCG(CpG16)GTTTTATCG(CpG17)CG(CpG18)TGATAA  
TTGAGAGTTTAGAGGGGGACG(CpG19)GAGAGGGAGGGAAGTCG(CpG20)GTTAGG  
CG(CpG21)TCG(CpG22)GGGTATTTAGTTAGGTGGCG(CpG23)GGGTTTGAACG(C  
pG24)GGGTTTTCG(CpG25)AAATGTTAAAGAAGAGATAGGTATTGGAGGGATTGTA  
GTTATTGGGATATATTTGGTTAGTTGTTCG(CpG26)AGCG(CpG27)ATGGCG(CpG2  
8)TGGAAAGGCG(CpG29)TAGATGGGAGTTGTTTGGTTTGGGGTTTCG(CpG30)GGA  
GGGCG(CpG31)GTTTTGTTAGGGGAGGGTGTGGGATTTAGGTTATGGTTTGGTTGG  
TTT

**Figure S2.** Location of cg06633438 investigated by EpiTYPER MassARRAY. Locations of cg06633438 (CpG10, in yellow) and other CpG sites very close (CpGn, in red), investigated by EpiTYPER MassARRAY. Flanking primers are underlined. The CpG sites could not be tested individually due to MassARRAY technology constraints, but had to be tested jointly as a single unit: the methylation level is the cumulative value of all the sites within the CpG unit.
